# Supplementary material for: A Comparative Study of Chamomile Essential Oils and Lipophilic Extracts Obtained by Conventional and Greener Extraction Techniques: Chemometric Approach to Chemical Composition and Biological Activity
Source: MDPI journal article supplement (doi:10.3390/separations10010018), 2022-12-29
Supplement: s1 [file s1]

Supplementary Material

# A Comparative Study of Chamomile Essential Oils and Lipophilic Extracts Obtained by Conventional and Greener Extraction Techniques: Chemometric Approach to Chemical Composition and Biological Activity

Gökhan Zengin <sup>1</sup>, Adriano Mollica <sup>2</sup>, Jelena Arsenijević <sup>3</sup>, Branimir Pavlić <sup>4</sup>, Zoran Zeković <sup>4</sup>, Kouadio Ibrahime Sinan <sup>1</sup>, Linlin Yan <sup>4</sup>, Aleksandra Cvetanović Kljakić <sup>5,\*</sup> and Slavica Ražić <sup>6,\*</sup>

**Table S1.** Composition of chamomile essential oils and extracts determined by GC-FID/MS analysis

| % <sup>a</sup> |                                                |                                      |                  |                   |        |        |          |         |       |       |       |       |
|----------------|------------------------------------------------|--------------------------------------|------------------|-------------------|--------|--------|----------|---------|-------|-------|-------|-------|
| #              | Constituent                                    | <i>R</i> <sub>exp</sub> <sup>b</sup> | HD-1             | HD-2              | MWHD-1 | MWHD-2 | Sox-MeCl | Sox-Hex | SFE-1 | SFE-2 | SFE-3 | SFE-4 |
| 1              | Yomogi alcohol                                 | 996.4                                | tr. <sup>c</sup> | n.d. <sup>d</sup> | tr.    | tr.    | n.d.     | n.d.    | n.d.  | n.d.  | n.d.  | n.d.  |
| 2              | Artemisia ketone                               | 1058.3                               | 0.24             | n.d.              | 0.19   | 0.27   | n.d.     | n.d.    | 0.15  | 0.19  | 0.19  | 0.26  |
| 3              | Artemisia alcohol                              | 1081.6                               | tr.              | n.d.              | tr.    | tr.    | n.d.     | n.d.    | n.d.  | n.d.  | n.d.  | n.d.  |
| 4              | Borneol                                        | 1167.8                               | tr.              | n.d.              | tr.    | tr.    | n.d.     | n.d.    | n.d.  | n.d.  | n.d.  | n.d.  |
| 5              | Artemisia acetate                              | 1171.0                               | tr.              | n.d.              | n.d.   | n.d.   | n.d.     | n.d.    | n.d.  | n.d.  | n.d.  | n.d.  |
| 6              | Menthol                                        | 1172.3                               | tr.              | n.d.              | tr.    | n.d.   | n.d.     | n.d.    | n.d.  | n.d.  | n.d.  | n.d.  |
| 7              | 4,8-Dimethyl-nona-3,8-dien-2-one               | 1273.4                               | tr.              | tr.               | tr.    | tr.    | n.d.     | n.d.    | n.d.  | n.d.  | n.d.  | n.d.  |
| 8              | Decanoic acid                                  | 1375.1                               | 1.87             | 1.52              | 1.48   | 1.50   | n.d.     | n.d.    | n.d.  | n.d.  | n.d.  | n.d.  |
| 9              | ( <i>E</i> )-Caryophyllene                     | 1419.6                               | tr.              | n.d.              | tr.    | tr.    | n.d.     | n.d.    | n.d.  | n.d.  | n.d.  | n.d.  |
| 10             | <b>(<i>E</i>)-<math>\beta</math>-Farnesene</b> | <b>1456.2</b>                        | <b>4.12</b>      | 3.23              | 3.48   | 3.49   | 0.78     | n.d.    | 1.04  | 1.45  | 1.32  | 1.22  |
| 11             | dehydro-Sesquicineole                          | 1468.7                               | 0.55             | 0.47              | 0.48   | 0.49   | n.d.     | n.d.    | n.d.  | n.d.  | n.d.  | n.d.  |

| % <sup>a</sup> |                                                              |                                       |              |              |              |              |              |              |              |              |              |              |
|----------------|--------------------------------------------------------------|---------------------------------------|--------------|--------------|--------------|--------------|--------------|--------------|--------------|--------------|--------------|--------------|
| #              | Constituent                                                  | <i>RI</i> <sub>exp</sub> <sup>b</sup> | HD-1         | HD-2         | MWHD-1       | MWHD-2       | Sox-MeCl     | Sox-Hex      | SFE-1        | SFE-2        | SFE-3        | SFE-4        |
| 12             | Germacrene D                                                 | 1482.1                                | 0.17         | tr.          | tr.          | tr.          | n.d.         | n.d.         | n.d.         | n.d.         | n.d.         | n.d.         |
| 13             | <i>β</i> -Selinene                                           | 1487.2                                | 0.31         | 0.25         | 0.28         | 0.28         | n.d.         | n.d.         | n.d.         | n.d.         | n.d.         | n.d.         |
| 14             | Bicyclogermacrene                                            | 1497.4                                | tr.          | tr.          | tr.          | tr.          | n.d.         | n.d.         | n.d.         | n.d.         | n.d.         | n.d.         |
| 15             | <i>β</i> -Bisabolene                                         | 1508.4                                | tr.          | n.d.         |
| 16             | ( <i>E</i> )-Nerolidol                                       | 1563.0                                | 0.67         | 0.50         | 0.58         | 0.61         | n.d.         | n.d.         | 0.19         | 0.22         | 0.20         | n.d.         |
| 17             | Dodecanoic acid                                              | 1567.0                                | tr.          | n.d.         | tr.          | tr.          | n.d.         | n.d.         | n.d.         | n.d.         | n.d.         | n.d.         |
| 18             | Dendrolasin                                                  | 1572.7                                | tr.          | tr.          | tr.          | tr.          | n.d.         | n.d.         | n.d.         | n.d.         | n.d.         | n.d.         |
| 19             | Spathulenol                                                  | 1578.6                                | 1.58         | 1.20         | 1.25         | 1.26         | n.d.         | 0.39         | 0.30         | 0.35         | 0.34         | 0.34         |
| 20             | Caryophyllene oxide                                          | 1583.9                                | 0.23         | tr.          | 0.17         | 0.18         | n.d.         | n.d.         | n.d.         | n.d.         | n.d.         | n.d.         |
| 21             | Viridiflorol                                                 | 1592.3                                | n.d.         | tr.          | n.d.         |
| 22             | Salvial-4(14)-en-1-one                                       | 1594.6                                | 0.23         | n.d.         | tr.          | tr.          | n.d.         | n.d.         | n.d.         | n.d.         | n.d.         | n.d.         |
| 23             | Nerolidol oxide                                              | 1631.7                                | 0.60         | 0.60         | 0.60         | 0.71         | n.d.         | n.d.         | n.d.         | n.d.         | n.d.         | n.d.         |
| 24             | Gossonorol                                                   | 1640.3                                | 0.14         | 0.12         | n.d.         |
| 25             | <i>epi-α</i> -Cadinol                                        | 1641.5                                | 0.14         | 0.12         | 0.24         | 0.26         | n.d.         | n.d.         | n.d.         | n.d.         | n.d.         | n.d.         |
| 26             | <b><i>α</i>-Bisabolol oxide B</b>                            | <b>1657.9</b>                         | <b>25.83</b> | <b>21.06</b> | <b>21.88</b> | <b>21.99</b> | <b>8.38</b>  | <b>5.53</b>  | <b>9.26</b>  | <b>9.21</b>  | <b>9.47</b>  | <b>9.69</b>  |
| 27             | <i>seco</i> -Bisabolol oxide B                               | 1664.0                                | 1.21         | 1.47         | 1.58         | 1.73         | n.d.         | n.d.         | n.d.         | n.d.         | n.d.         | n.d.         |
| 28             | Xanthoxylin (brevifolin)                                     | 1672.7                                | 0.16         | 0.23         | 0.19         | 0.21         | 0.58         | 0.93         | 0.30         | 0.27         | 0.28         | 0.26         |
| 29             | <b><i>α</i>-Bisabolone oxide A</b>                           | 1684.8                                | 8.20         | 6.26         | 6.74         | 6.83         | 2.21         | 0.61         | 2.34         | 2.78         | 2.58         | 2.59         |
| 30             | <i>α</i> -Bisabolol                                          | 1685.5                                | 0.43         | 0.33         | 0.35         | 0.36         | tr.          | tr.          | 0.26         | 0.40         | 0.52         | 0.29         |
| 31             | Germacra-4(15),5,10(14)-trien-1- <i>α</i> -ol                | 1689.0                                | 0.38         | tr.          | 0.32         | 0.33         | n.d.         | n.d.         | n.d.         | n.d.         | n.d.         | n.d.         |
| 32             | <b>Chamazulene</b>                                           | <b>1732.6</b>                         | <b>4.95</b>  | <b>4.59</b>  | <b>4.96</b>  | <b>5.21</b>  | n.d.         | n.d.         | n.d.         | n.d.         | n.d.         | n.d.         |
| 33             | <b><i>α</i>-Bisabolol oxide A</b>                            | <b>1750.7</b>                         | <b>29.71</b> | <b>34.41</b> | <b>33.62</b> | <b>33.22</b> | <b>18.39</b> | <b>11.84</b> | <b>16.41</b> | <b>20.47</b> | <b>21.04</b> | <b>21.14</b> |
| 34             | Benzyl benzoate                                              | 1765.8                                | n.d.         | n.d.         | tr.          | tr.          | n.d.         | n.d.         | n.d.         | n.d.         | n.d.         | n.d.         |
| 35             | Hexahydrofarnesyl acetone                                    | 1843.2                                | 0.20         | 0.20         | 0.22         | 0.25         | n.d.         | 0.32         | 0.17         | n.d.         | n.d.         | n.d.         |
| 36             | <b>(<i>Z</i>)-Spiroether (<i>cis</i>-en-yn-dicycloether)</b> | <b>1883.8</b>                         | <b>9.19</b>  | <b>11.72</b> | <b>10.86</b> | <b>9.44</b>  | <b>12.81</b> | <b>5.15</b>  | <b>8.66</b>  | <b>9.31</b>  | <b>8.07</b>  | <b>7.47</b>  |

| % <sup>a</sup> |                                                             |                                       |      |      |        |        |              |              |              |              |              |              |
|----------------|-------------------------------------------------------------|---------------------------------------|------|------|--------|--------|--------------|--------------|--------------|--------------|--------------|--------------|
| #              | Constituent                                                 | <i>RI</i> <sub>exp</sub> <sup>b</sup> | HD-1 | HD-2 | MWHD-1 | MWHD-2 | Sox-MeCl     | Sox-Hex      | SFE-1        | SFE-2        | SFE-3        | SFE-4        |
| 37             | ( <i>E</i> )-Spiroether ( <i>trans</i> -en-yn-dicycloether) | 1895.5                                | 0.48 | 0.61 | 0.52   | 0.80   | <b>5.32</b>  | <b>6.61</b>  | 1.21         | 1.19         | 1.02         | 0.92         |
| 38             | ( <i>Z</i> )-Tibetin spiroether                             | 1919.4                                | tr.  | tr.  | tr.    | tr.    | n.d.         | n.d.         | n.d.         | n.d.         | n.d.         | n.d.         |
| 39             | ( <i>E</i> )-Tibetin spiroether                             | 1952.8                                | 0.48 | 0.57 | 0.49   | 0.45   | n.d.         | n.d.         | 0.26         | 0.34         | 0.26         | 0.80         |
| 40             | Hexadecanoic acid                                           | 1963.4                                | 1.28 | 2.17 | 1.67   | 1.72   | n.d.         | 1.75         | 0.76         | 0.81         | 0.64         | n.d.         |
| 41             | Linoleic acid                                               | 2133.7                                | 0.30 | 0.69 | 0.39   | 0.42   | 1.16         | 0.58         | 0.70         | 0.62         | 0.45         | 0.64         |
| 42             | Linolenic acid                                              | 2139.7                                | 0.33 | 0.67 | 0.37   | 0.41   | 1.32         | 0.79         | 0.80         | 0.72         | 0.56         | 0.73         |
| 43             | Leucodin                                                    | 2171.2                                | n.d. | n.d. | n.d.   | n.d.   | n.d.         | n.d.         | 0.19         | 0.22         | n.d.         | n.d.         |
| 44             | Achillin                                                    | 2215.4                                | n.d. | n.d. | n.d.   | n.d.   | 1.24         | 1.15         | 1.24         | 1.33         | 1.14         | 1.56         |
| 45             | Matricin/Achillicin                                         | 2293.8                                | n.d. | n.d. | n.d.   | n.d.   | n.d.         | n.d.         | 1.25         | 1.40         | 1.31         | 1.26         |
| 46             | Tricosane                                                   | 2298.4                                | 0.24 | 0.26 | 0.32   | 0.30   | 1.04         | 0.98         | 0.89         | 0.82         | 0.82         | 0.82         |
| 47             | Matricarin/Acetoxyachillin                                  | 2394.3                                | n.d. | n.d. | n.d.   | n.d.   | n.d.         | n.d.         | 0.22         | 0.28         | 0.24         | 0.33         |
| 48             | Tetracosane                                                 | 2397.6                                | tr.  | tr.  | tr.    | tr.    | 0.65         | 0.66         | 0.62         | 0.56         | 0.57         | 0.57         |
| 49             | Matricarin/Acetoxyachillin                                  | 2411.7                                | n.d. | n.d. | n.d.   | n.d.   | 1.57         | 1.63         | 1.56         | 1.74         | 1.93         | 2.11         |
| 50             | <b>Pentacosane</b>                                          | <b>2499.1</b>                         | 1.89 | 2.61 | 2.60   | 2.59   | <b>13.79</b> | <b>15.35</b> | <b>13.87</b> | <b>12.54</b> | <b>12.75</b> | <b>12.79</b> |
| 51             | 3-ethyl-Tetracosane                                         | 2570.7                                | n.d. | n.d. | n.d.   | n.d.   | n.d.         | n.d.         | 0.30         | 0.22         | 0.21         | n.d.         |
| 52             | Hexacosane                                                  | 2597.3                                | n.d. | tr.  | tr.    | tr.    | 0.71         | 0.84         | 0.88         | 0.74         | 0.73         | 0.76         |
| 53             | <b>Heptacosane</b>                                          | <b>2698.7</b>                         | 0.50 | 0.81 | 0.66   | 0.72   | <b>9.22</b>  | <b>11.71</b> | <b>10.45</b> | <b>9.25</b>  | <b>9.46</b>  | <b>9.85</b>  |
| 54             | 13-Methyl + 11-Methyl heptacosane                           | 2730.6                                | n.d. | n.d. | n.d.   | tr.    | 0.63         | 0.53         | 0.26         | 0.26         | 0.31         | n.d.         |
| 55             | 7-Methyl heptacosane                                        | 2739.7                                | n.d. | n.d. | n.d.   | n.d.   | 0.85         | 0.73         | 0.58         | 0.54         | 0.51         | 0.54         |
| 56             | 3-Methyl heptacosane                                        | 2771.7                                | n.d. | n.d. | n.d.   | n.d.   | 0.81         | 0.92         | 0.79         | 0.71         | 0.70         | 0.73         |
| 57             | Octacosane                                                  | 2798.0                                | n.d. | n.d. | n.d.   | n.d.   | n.d.         | 0.77         | 0.71         | 0.61         | 0.62         | 0.59         |
| 58             | 12-Methyl octacosane                                        | 2836.3                                | n.d. | n.d. | n.d.   | n.d.   | n.d.         | n.d.         | 0.14         | n.d.         | n.d.         | n.d.         |
| 59             | 4,12-Dimethyl octacosane                                    | 2880.0                                | n.d. | n.d. | n.d.   | n.d.   | 0.57         | n.d.         | n.d.         | n.d.         | n.d.         | n.d.         |
| 60             | <b>Nonacosane</b>                                           | <b>2900.5</b>                         | 0.15 | 0.25 | 0.18   | 0.21   | <b>7.72</b>  | <b>10.27</b> | <b>8.61</b>  | <b>7.50</b>  | <b>7.77</b>  | <b>8.35</b>  |

| % <sup>a</sup>                  |                                     |                                       |       |       |        |        |          |             |       |       |       |       |
|---------------------------------|-------------------------------------|---------------------------------------|-------|-------|--------|--------|----------|-------------|-------|-------|-------|-------|
| #                               | Constituent                         | <i>RI</i> <sub>exp</sub> <sup>b</sup> | HD-1  | HD-2  | MWHD-1 | MWHD-2 | Sox-MeCl | Sox-Hex     | SFE-1 | SFE-2 | SFE-3 | SFE-4 |
|                                 | 11-Methyl+13-Methyl+15-Methyl       |                                       |       |       |        |        |          |             |       |       |       |       |
| 61                              | nonacosane                          | 2932.2                                | n.d.  | n.d.  | n.d.   | n.d.   | n.d.     | 0.75        | 0.59  | 0.51  | 0.47  | 0.56  |
| 62                              | 7-Methyl nonacosane                 | 2941.7                                | n.d.  | n.d.  | n.d.   | n.d.   | 0.64     | 0.61        | 0.52  | 0.45  | 0.43  | 0.49  |
|                                 | 13,17-Dimethyl+11,15-Dimethyl+9,13- |                                       |       |       |        |        |          |             |       |       |       |       |
| 63                              | Dimethyl nonacosane                 | 2962.0                                | n.d.  | n.d.  | n.d.   | n.d.   | n.d.     | n.d.        | 0.17  | 0.27  | n.d.  | 0.27  |
| 64                              | 3-Methyl nonacosane                 | 2974.1                                | n.d.  | n.d.  | n.d.   | n.d.   | 0.65     | 0.47        | 0.42  | 0.35  | 0.44  | 0.40  |
| 65                              | Triacontane                         | 2999.9                                | n.d.  | n.d.  | n.d.   | n.d.   | n.d.     | 0.90        | 0.73  | 0.61  | 0.43  | 0.48  |
| 66                              | <b>Untriacontane</b>                | <b>3100.9</b>                         | n.d.  | n.d.  | n.d.   | n.d.   | 3.34     | <b>4.81</b> | 3.66  | 3.32  | 3.39  | 3.73  |
|                                 | 9-Methyl+11-Methyl+13-Methyl+15-    |                                       |       |       |        |        |          |             |       |       |       |       |
| 67                              | Methyl untriacontane                | 3128.3                                | n.d.  | n.d.  | n.d.   | n.d.   | 0.79     | 0.76        | 0.63  | 0.50  | 0.52  | 0.65  |
|                                 | 13,17-Dimethyl+11,15-Dimethyl+9,13- |                                       |       |       |        |        |          |             |       |       |       |       |
| 68                              | Dimethyl untriacontane              | 3138.7                                | n.d.  | n.d.  | n.d.   | n.d.   | 0.80     | 0.94        | 0.80  | 0.70  | 0.73  | 0.79  |
| Identified %                    |                                     |                                       | 96.35 | 96.58 | 96.30  | 95.86  | 95.96    | 89.27       | 92.63 | 93.37 | 91.88 | 93.67 |
| Oxygenated monoterpenes         |                                     |                                       | 0.24  | n.d.  | 0.19   | 0.27   | n.d.     | n.d.        | 0.15  | 0.19  | 0.19  | 0.26  |
| Sesquiterpenes                  |                                     |                                       | 5.16  | 3.94  | 4.24   | 4.26   | 0.78     | n.d.        | 1.04  | 1.45  | 1.32  | 1.22  |
| Oxygenated sesquiterpenes       |                                     |                                       | 68.92 | 65.74 | 66.98  | 67.11  | 31.79    | 21.15       | 32.96 | 37.99 | 38.25 | 39.01 |
| Sum of bisabolol oxides A and B |                                     |                                       | 55.54 | 55.47 | 55.50  | 55.21  | 26.77    | 17.38       | 25.67 | 29.67 | 30.51 | 30.83 |
| Sesquiterpene lactones          |                                     |                                       | n.d.  | n.d.  | n.d.   | n.d.   | 2.81     | 2.77        | 4.46  | 4.97  | 4.62  | 5.26  |
| Azulenes <sup>e</sup>           |                                     |                                       | 4.95  | 4.59  | 4.96   | 5.21   | n.d.     | n.d.        | n.d.  | n.d.  | n.d.  | n.d.  |
| Other compounds                 |                                     |                                       | 17.08 | 22.31 | 19.94  | 19.01  | 63.40    | 68.12       | 58.49 | 53.74 | 52.12 | 53.18 |
| Spiroethers                     |                                     |                                       | 10.16 | 12.90 | 11.86  | 10.69  | 18.13    | 11.76       | 10.12 | 10.84 | 9.35  | 9.19  |
| Hydrocarbons                    |                                     |                                       | 2.79  | 3.92  | 3.75   | 3.82   | 42.21    | 51.99       | 45.62 | 40.47 | 40.85 | 42.36 |

<sup>a</sup>Calculated by peak normalization procedure. Major constituents (>4.00%) are marked in bold. <sup>b</sup>Experimentally obtained linear retention indices, relative to C8–C40 *n*-alkanes on HP5-MS column. <sup>c</sup>Trace, <0.005%. <sup>d</sup>Not detected compound. <sup>e</sup>Artefacts of sesquiterpene lactones formed during distillation.

**Table S2. Pearson's correlation values between compounds and tested enzymes (red color indicates high correlation)**

| Correlation | AChE  | BChE  | Tyrosinase | Amylase | Glucosidase |
|-------------|-------|-------|------------|---------|-------------|
| AChE        | 1.00  | 0.94  | 0.94       | -0.99   | 1.00        |
| BChE        | 0.94  | 1.00  | 0.89       | -0.97   | 0.99        |
| Tyrosinase  | 0.94  | 0.89  | 1.00       | -0.95   | 0.94        |
| Amylase     | -0.99 | -0.97 | -0.95      | 1.00    | -0.99       |
| Glucosidase | 1.00  | 0.99  | 0.94       | -0.99   | 1.00        |
| C2          | -0.24 | -0.07 | -0.21      | 0.20    | -0.06       |
| C8          | -0.97 | -0.97 | -0.96      | 0.98    | -0.99       |
| C10         | -0.93 | -0.91 | -0.92      | 0.94    | -0.94       |
| C11         | -0.98 | -0.97 | -0.96      | 0.99    | -1.00       |
| C12         | -0.32 | -0.38 | -0.50      | 0.39    | -0.50       |
| C13         | -0.98 | -0.96 | -0.95      | 0.99    | -0.99       |
| C16         | -0.93 | -0.89 | -0.91      | 0.92    | -0.93       |
| C19         | -0.94 | -0.93 | -0.94      | 0.94    | -0.96       |
| C20         | -0.80 | -0.71 | -0.75      | 0.78    | -0.75       |
| C22         | -0.32 | -0.38 | -0.50      | 0.39    | -0.50       |
| C23         | -1.00 | -0.95 | -0.96      | 0.99    | -1.00       |
| C24         | -0.51 | -0.64 | -0.71      | 0.60    | -0.75       |
| C25         | -0.96 | -0.86 | -0.83      | 0.92    | -0.93       |
| C26         | -0.95 | -0.94 | -0.95      | 0.97    | -0.97       |
| C27         | -1.00 | -0.95 | -0.92      | 0.99    | -0.99       |
| C28         | 0.51  | 0.47  | 0.50       | -0.53   | 0.50        |
| C29         | -0.93 | -0.92 | -0.93      | 0.95    | -0.95       |
| C30         | -0.35 | -0.31 | -0.37      | 0.36    | -0.35       |
| C31         | -0.81 | -0.72 | -0.74      | 0.79    | -0.75       |
| C32         | -0.99 | -0.96 | -0.95      | 0.99    | -1.00       |
| C33         | -0.93 | -0.90 | -0.87      | 0.94    | -0.92       |
| C35         | -0.58 | -0.56 | -0.54      | 0.53    | -0.50       |
| C36         | -0.40 | -0.47 | -0.35      | 0.45    | -0.44       |
| C37         | 0.48  | 0.45  | 0.48       | -0.49   | 0.48        |
| C39         | -0.43 | -0.42 | -0.44      | 0.46    | -0.46       |
| C40         | -0.71 | -0.73 | -0.68      | 0.67    | -0.68       |
| C41         | 0.51  | 0.44  | 0.47       | -0.47   | 0.47        |
| C42         | 0.66  | 0.60  | 0.62       | -0.64   | 0.63        |
| C43         | 0.40  | 0.40  | 0.37       | -0.45   | 0.37        |
| C44         | 0.97  | 0.97  | 0.94       | -0.98   | 0.98        |
| C45         | 0.66  | 0.69  | 0.63       | -0.67   | 0.62        |
| C46         | 0.95  | 0.94  | 0.94       | -0.96   | 0.97        |

|     |      |      |      |       |      |
|-----|------|------|------|-------|------|
| C47 | 0.65 | 0.68 | 0.62 | -0.66 | 0.61 |
| C48 | 0.98 | 0.96 | 0.95 | -0.99 | 0.99 |
| C49 | 0.97 | 0.97 | 0.94 | -0.98 | 0.98 |
| C50 | 0.97 | 0.96 | 0.95 | -0.99 | 0.99 |
| C51 | 0.52 | 0.52 | 0.49 | -0.54 | 0.48 |
| C52 | 0.98 | 0.97 | 0.94 | -0.99 | 0.99 |
| C53 | 0.98 | 0.96 | 0.94 | -0.99 | 0.99 |
| C54 | 0.70 | 0.66 | 0.69 | -0.71 | 0.69 |
| C55 | 0.94 | 0.92 | 0.91 | -0.94 | 0.95 |
| C56 | 0.98 | 0.96 | 0.94 | -0.99 | 0.99 |
| C57 | 0.80 | 0.81 | 0.77 | -0.84 | 0.78 |
| C58 | 0.26 | 0.25 | 0.24 | -0.27 | 0.24 |
| C59 | 0.26 | 0.22 | 0.26 | -0.21 | 0.25 |
| C60 | 0.97 | 0.96 | 0.94 | -0.99 | 0.98 |
| C61 | 0.79 | 0.79 | 0.76 | -0.83 | 0.77 |
| C62 | 0.96 | 0.94 | 0.93 | -0.96 | 0.97 |
| C63 | 0.52 | 0.54 | 0.48 | -0.54 | 0.48 |
| C64 | 0.94 | 0.91 | 0.91 | -0.93 | 0.94 |
| C65 | 0.76 | 0.75 | 0.72 | -0.81 | 0.73 |
| C66 | 0.97 | 0.95 | 0.93 | -0.98 | 0.97 |
| C67 | 0.95 | 0.93 | 0.92 | -0.95 | 0.96 |
| C68 | 0.98 | 0.96 | 0.94 | -0.99 | 0.99 |
